# Supplementary material for: Sex differences in learning from exploration
Source: eLife journal article supplement (doi:10.7554/elife.69748), 2021-11-19
Supplement: supp [file elife-69748-supp-v1.zip]

Archive with 7 entries (7 files):
- elife_poa_e69748_Figure_1_figure_supplement_1.jpg
- elife_poa_e69748_Figure_2_figure_supplement_1.jpg
- elife_poa_e69748_Figure_3_figure_supplement_1.jpg
- elife_poa_e69748_Figure_4_figure_supplement_1.jpg
- elife_poa_e69748_Transparent_Reporting_File.pdf
- elife_poa_e69748_Supplementary_file_1.docx
- elife_poa_e69748_Supplementary_file_2.docx
