# Supplementary figures and images for: Sex differences in learning from exploration
Source: eLife journal article supplement (doi:10.7554/elife.69748), 2021-11-19

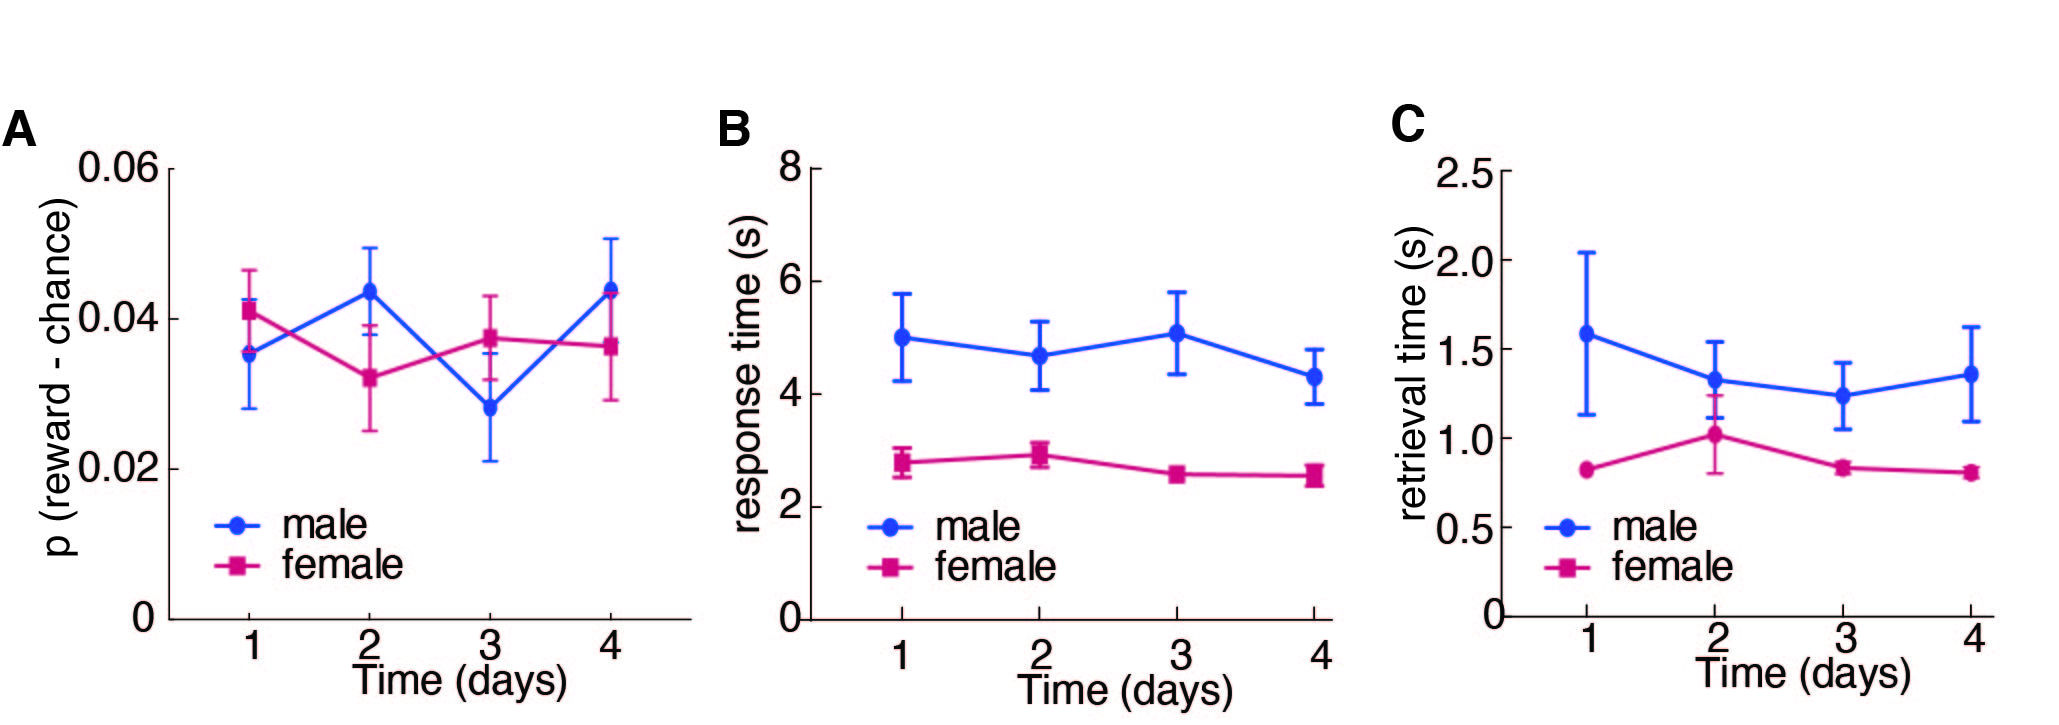

Supplement: supp [file elife-69748-supp-v1.zip › elife_poa_e69748_Figure_1_figure_supplement_1.jpg]

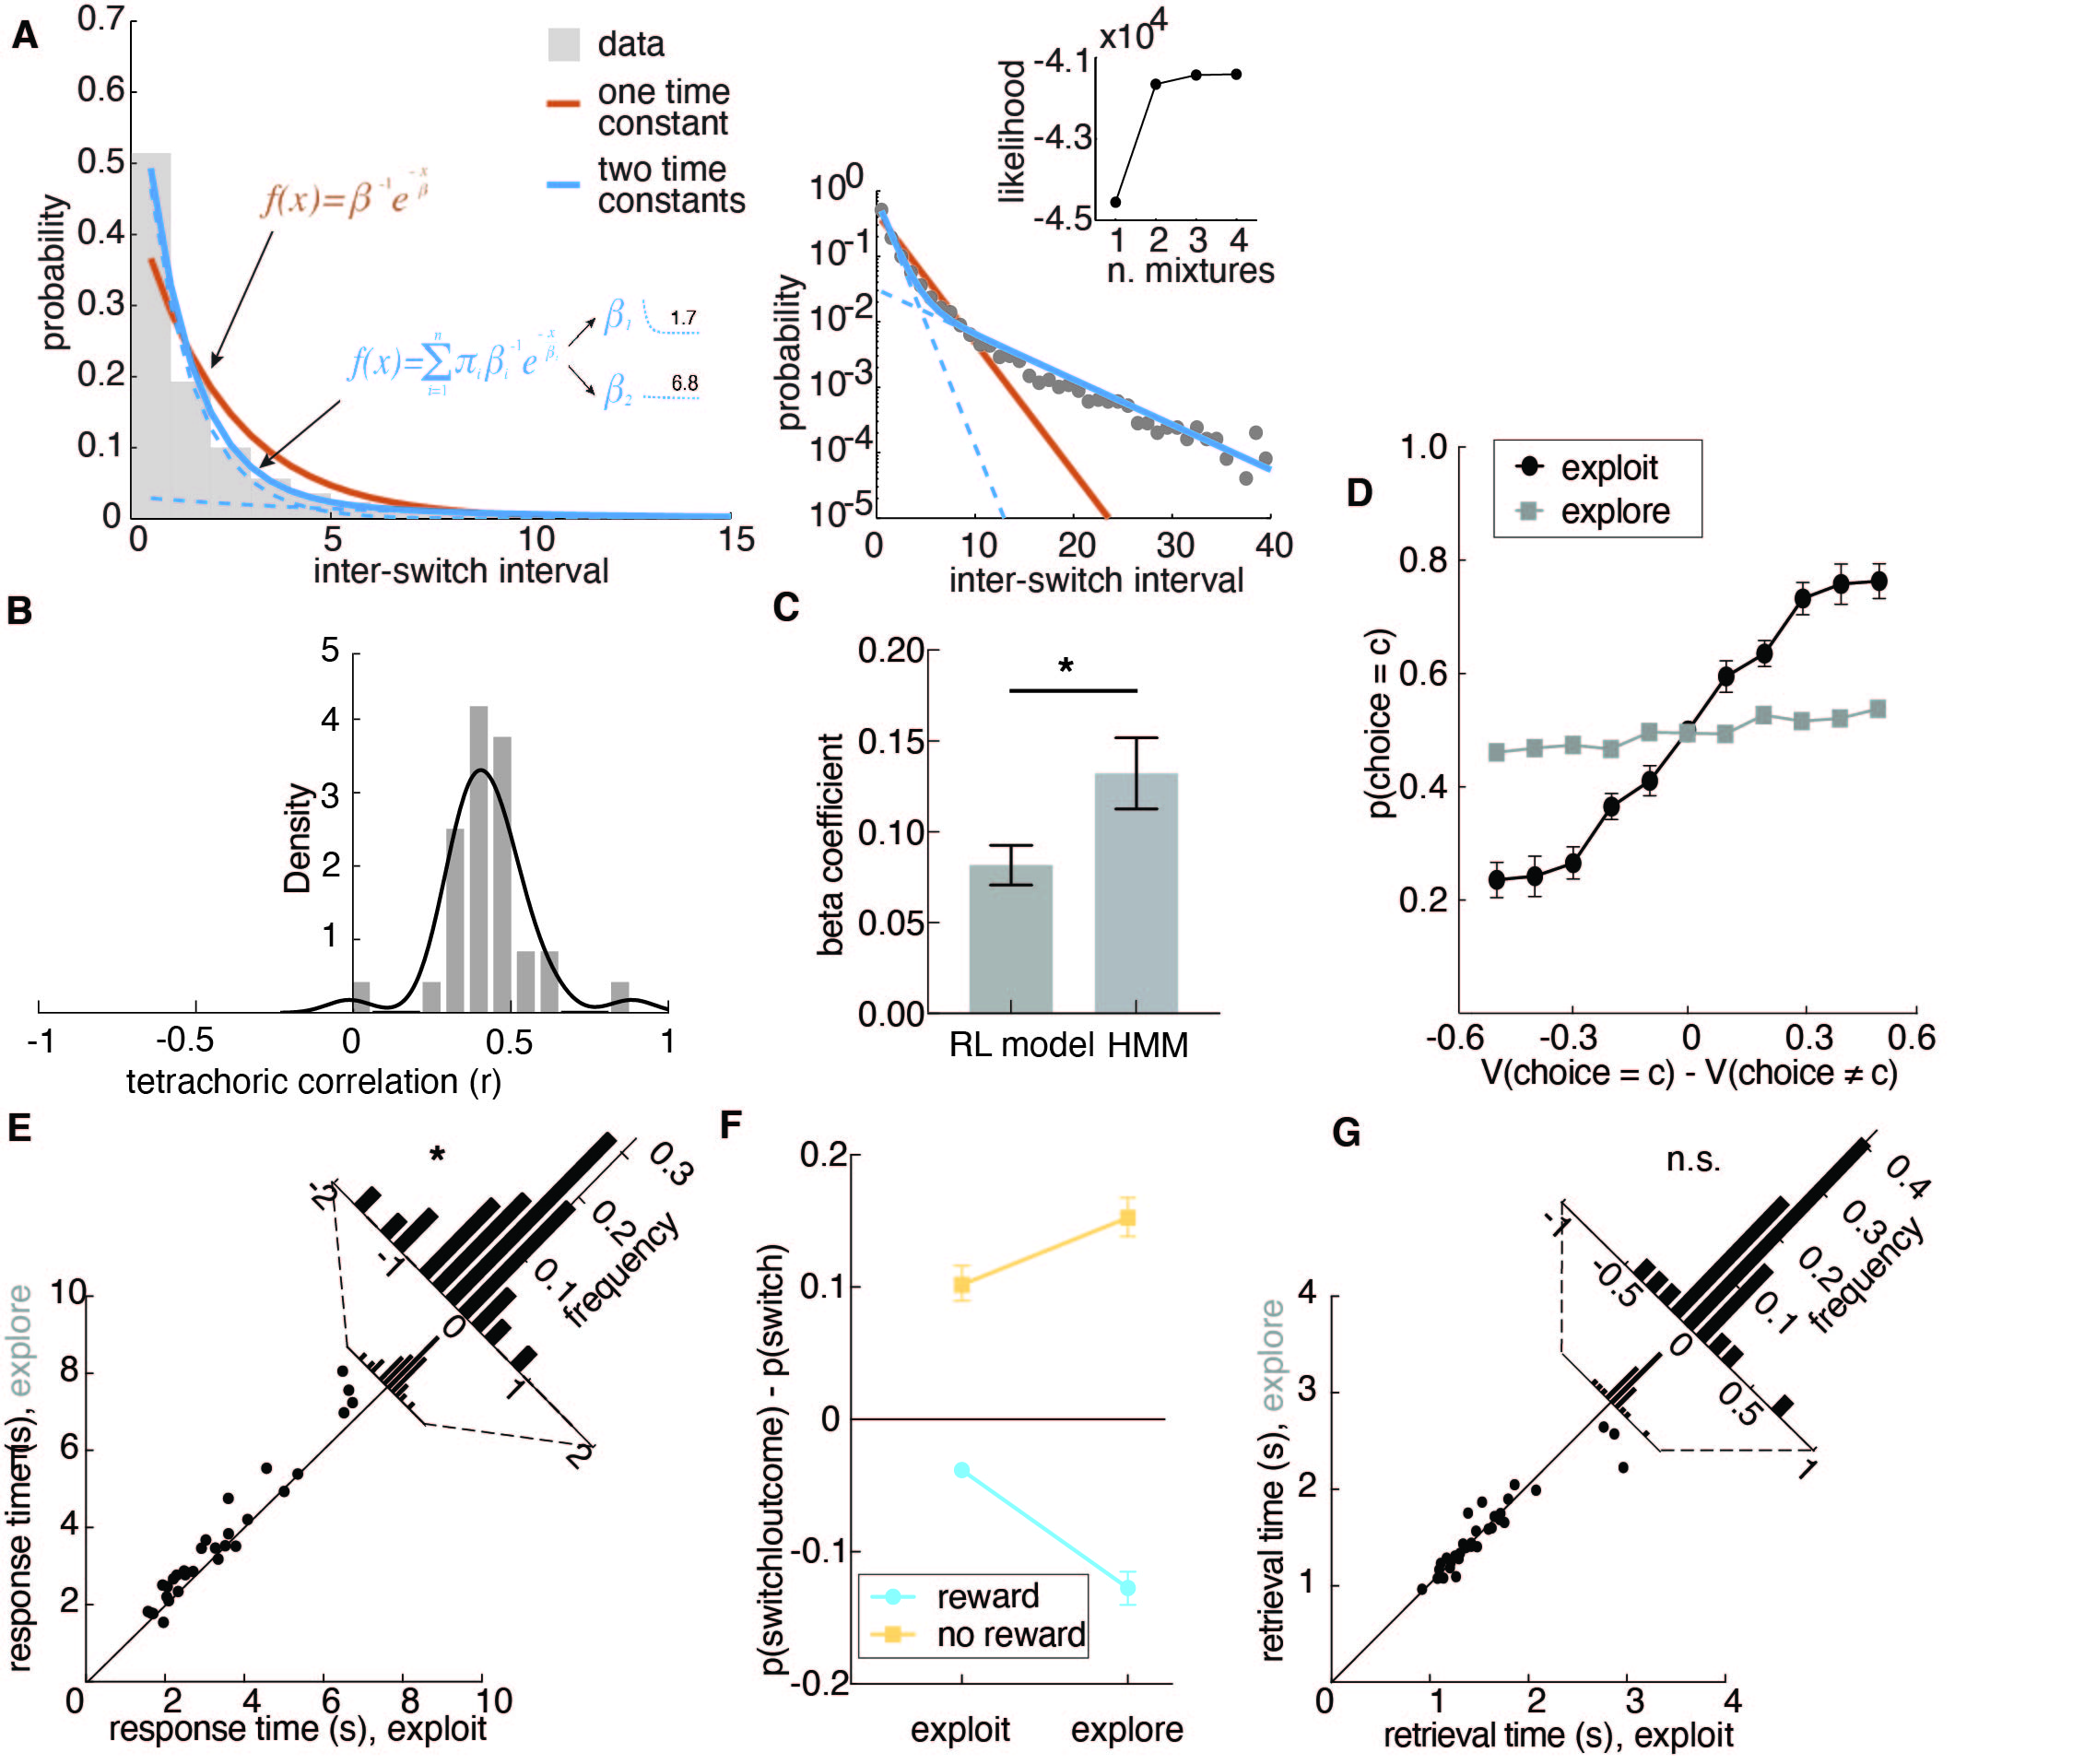

Supplement: supp [file elife-69748-supp-v1.zip › elife_poa_e69748_Figure_2_figure_supplement_1.jpg]

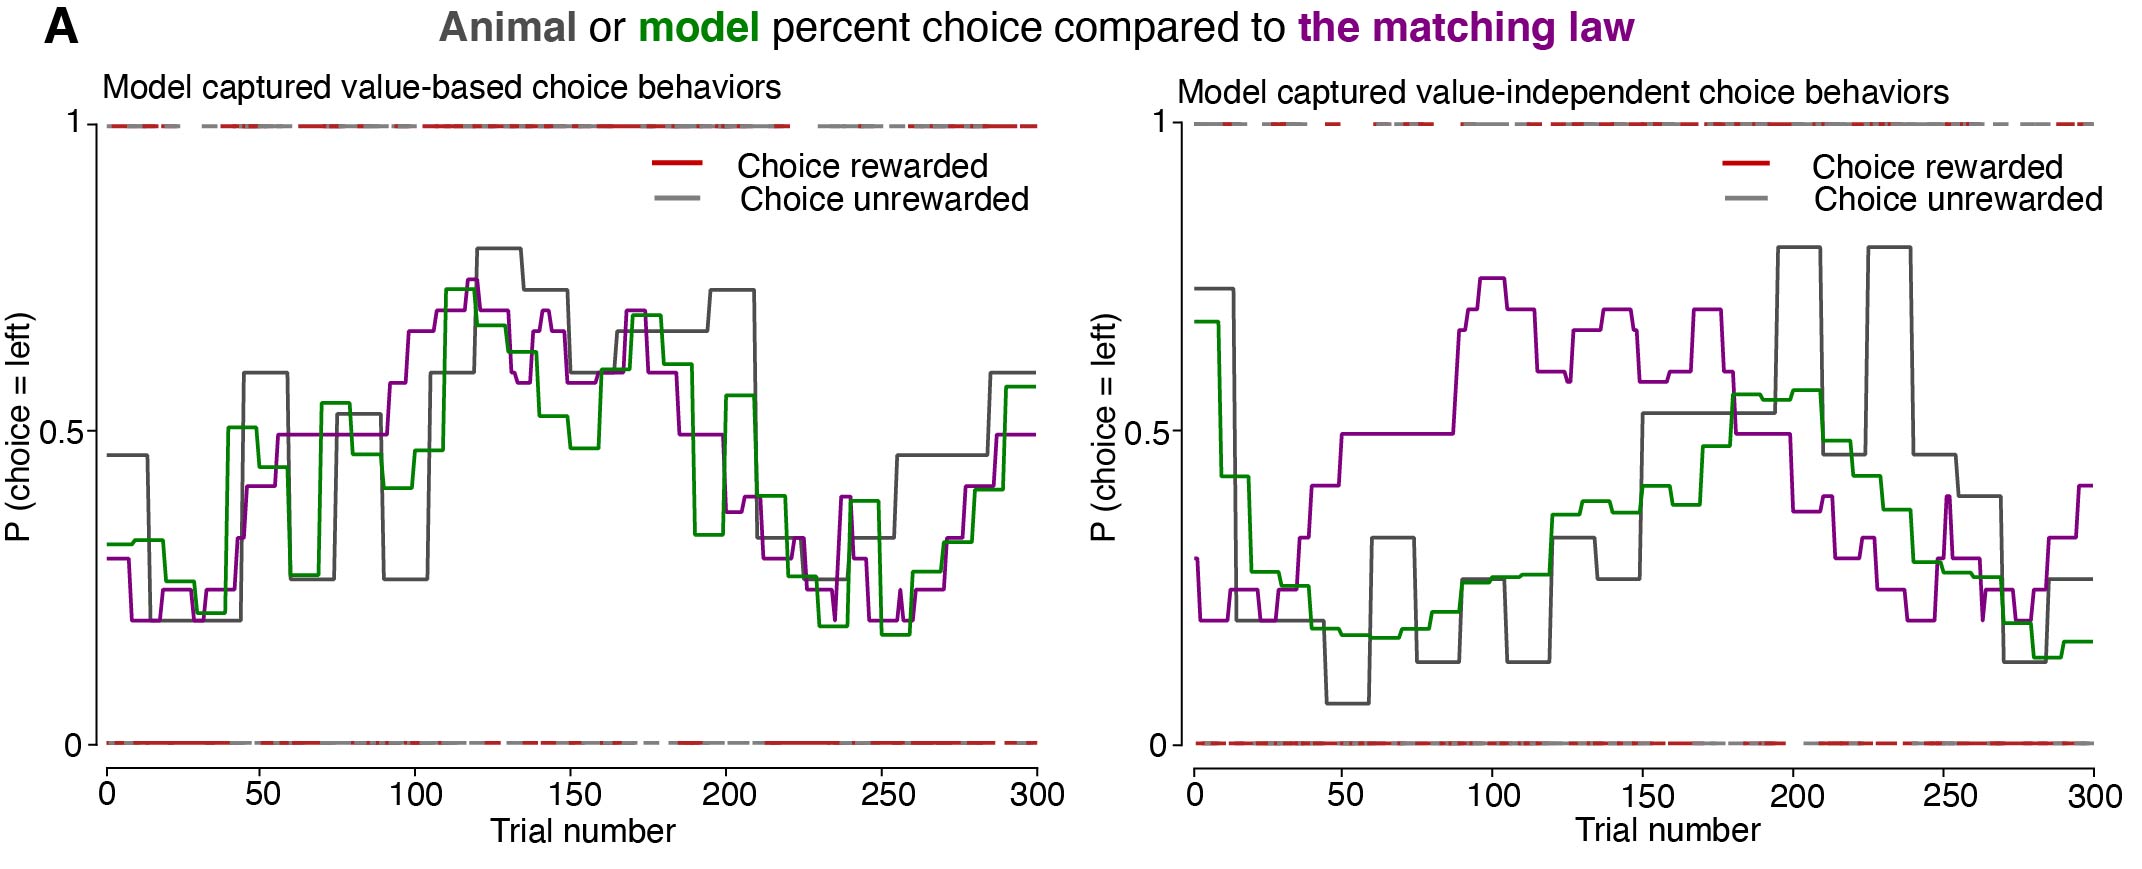

Supplement: supp [file elife-69748-supp-v1.zip › elife_poa_e69748_Figure_3_figure_supplement_1.jpg]

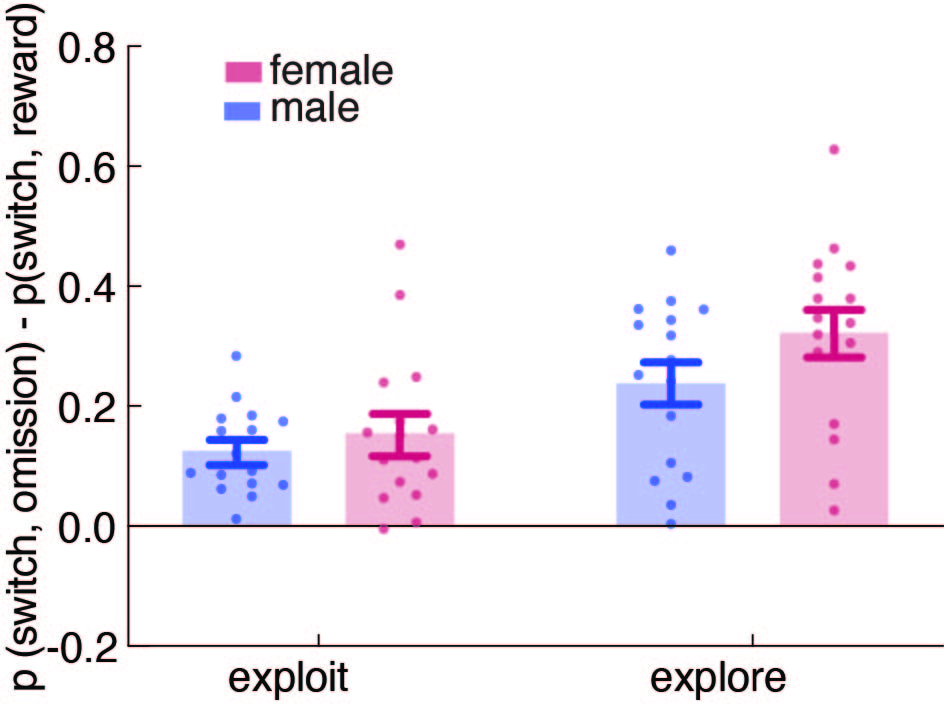

Supplement: supp [file elife-69748-supp-v1.zip › elife_poa_e69748_Figure_4_figure_supplement_1.jpg]
